# Supplementary material for: Wireless Flexible System for Highly Sensitive Ammonia Detection Based on Polyaniline/Carbon Nanotubes
Source: MDPI journal article supplement (doi:10.3390/bios14040191), 2024-04-13
Supplement: s1 [file s1]

# Wireless Flexible System for Highly Sensitive Ammonia Detection Based on Polyaniline/Carbon Nanotubes

Yi Zhuang, Xue Wang, Pengfei Lai, Jin Li, Le Chen, Yuanjing Lin \* and Fei Wang \*

The School of Microelectronics, Southern University of Science and Technology, Shenzhen 518055, China; 12131139@mail.sustech.edu.cn (Y.Z.); 12132475@mail.sustech.edu.cn (X.W.); 12333358@mail.sustech.edu.cn (P.L.); lij3@mail.sustech.edu.cn (J.L.); 12232522@mail.sustech.edu.cn (L.C.)

\* Correspondence: linyj2020@sustech.edu.cn (Y.L.); wangf@sustech.edu.cn (F.W.)

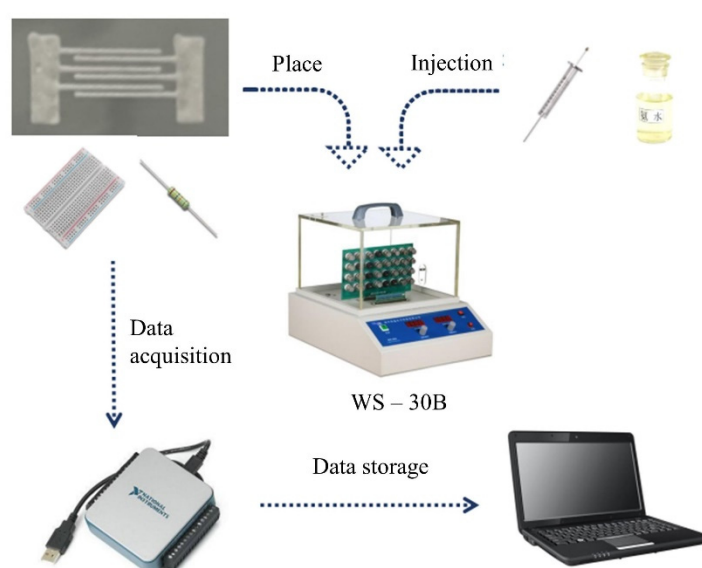

**Figure S1.** Gas test system based on WS-30B.

The testing procedure for this system involves several steps. Initially, the test circuit is placed inside the gas testing chamber and connected to a data acquisition card and a computer. Subsequently, a measured amount of the liquid to be tested is injected onto the heating plate using a micro-syringe, allowing it to heat and evaporate. To ensure a uniform and stable atmosphere, a fan within the chamber is utilized to circulate the air.

Following this, the data acquisition card captures the test signals, which are then stored on the computer. During the testing process, it is essential to calculate the relationship between the required gas concentration and the injected liquid volume. This calculation can be performed using the following formula:

$$V_c \times c = V_l \times \rho \times \omega \div M \times V_m$$

For instance, if the chamber volume ( $V_c$ ) is 18 L and the targeted ammonia gas concentration ( $c$ ) is 50 ppm (or  $50 \times 10^{-6}$ ), with the density of the 25 wt. % ammonia solution being 900 g/L and its molar mass at 35 g/mol, and with the molar volume at 27°C being approximately 24.630 L/mol, the calculation would yield a required volume of 25 wt. % ammonia solution ( $V_l$ ) of about 5.684  $\mu$ L.

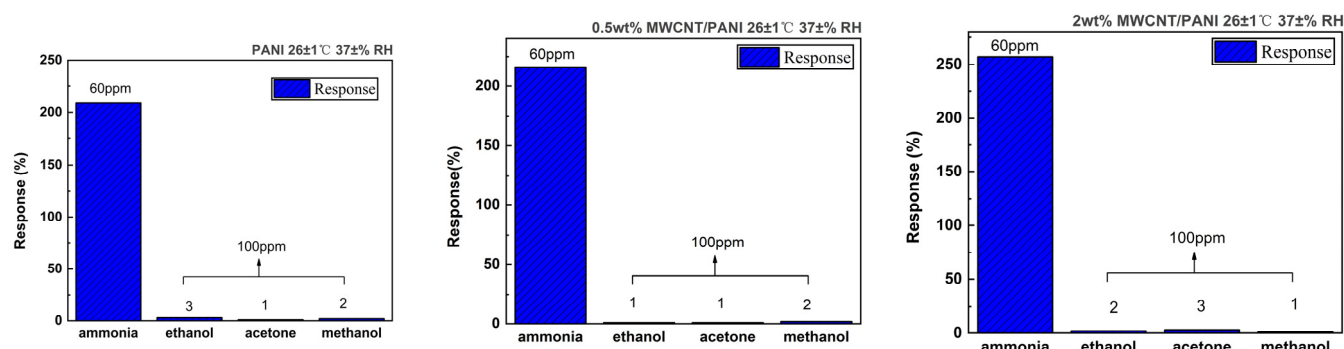

**Figure S2.** Selectivity testing of sensors with different modification ratios.

**Table S1.** K values comparison of MWCNTs/PANI developed here and other sensing materials reported recently.

| Materials                                        | Tested gases (K value <sup>a</sup> ) |         |          | Ref.      |
|--------------------------------------------------|--------------------------------------|---------|----------|-----------|
|                                                  | Ethanol                              | Acetone | Methanol |           |
| TiO <sub>2</sub> /Ti <sub>3</sub> C <sub>2</sub> | 9.5                                  | 4.75    | -        | [1]       |
| Ti <sub>3</sub> C <sub>2</sub>                   | 0.44                                 | 0.8     | -        | [2]       |
| PANI                                             | 18                                   | -       | 18.5     | [3]       |
| MWCNTs/PANI                                      | 81                                   | 121.5   | 121.5    | This work |

<sup>a</sup>  $K = S_a/S_b$ ,  $S_a$  is the response of the sensor to NH<sub>3</sub> gas, and  $S_b$  is the response of sensor to other target gases.

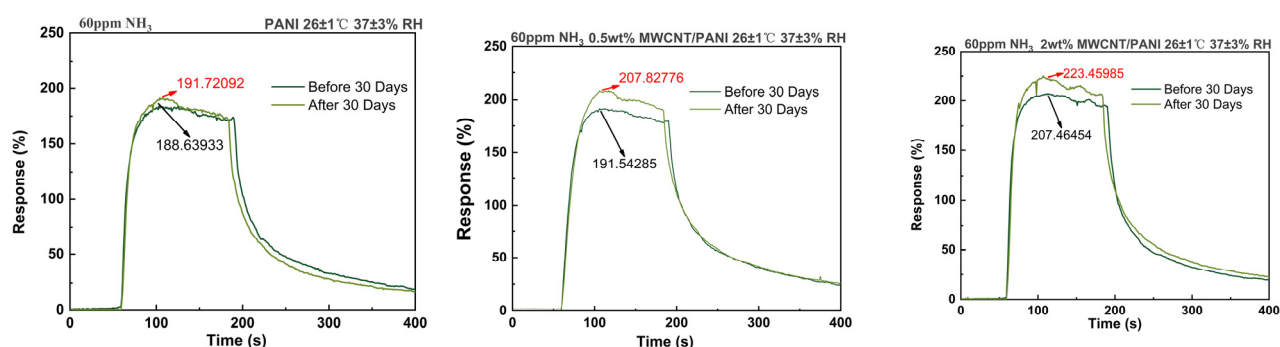

**Figure S3.** Stability testing of sensors with different modification ratios.

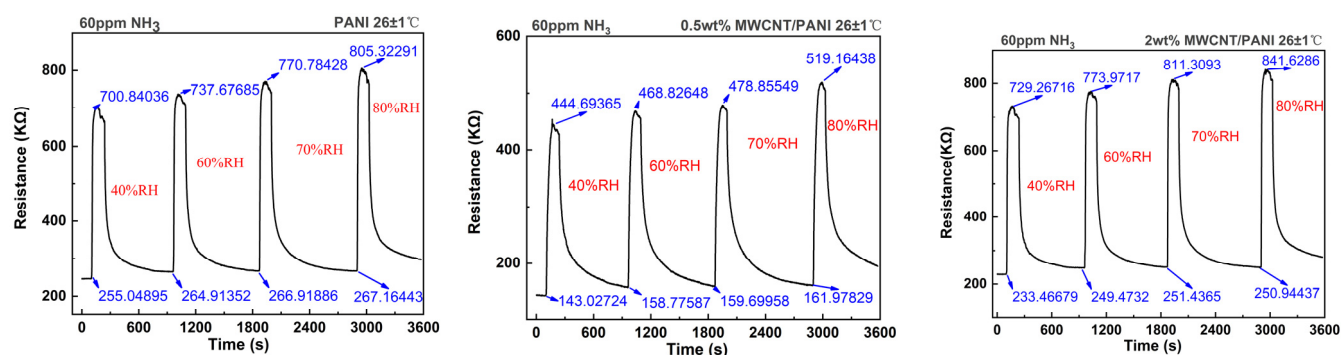

**Figure S4.** Humidity resistance testing of sensors with different modification ratios.

All performance tests and the results of the original tests show consistency, i.e. good selectivity and stability, as well as a certain degree of humidity resistance.

**Table S2.** Response variation comparison of MWCNTs/PANI developed here and other sensing materials reported recently.

| Materials                                              | Test Concentration | Relative Humidity | Response Variation | Ref.      |
|--------------------------------------------------------|--------------------|-------------------|--------------------|-----------|
| PANI:PSS/Ti <sub>3</sub> C <sub>2</sub> T <sub>x</sub> | 1 ppm              | 0% -80%           | 30%                | [4]       |
| Polyaniline-WO <sub>3</sub>                            | 100 ppm            | 40% -80%          | 25%                | [5]       |
| GP-PANI/PVDF                                           | 1 ppm              | 20% -80%          | 25%                | [6]       |
| MWCNTs/PANI                                            | 60 ppm             | 40% -80%          | 13%                | This work |

Response variation =  $(R_{\text{Max}} - R_{\text{min}}) / R_{\text{min}}$ , where R means response.

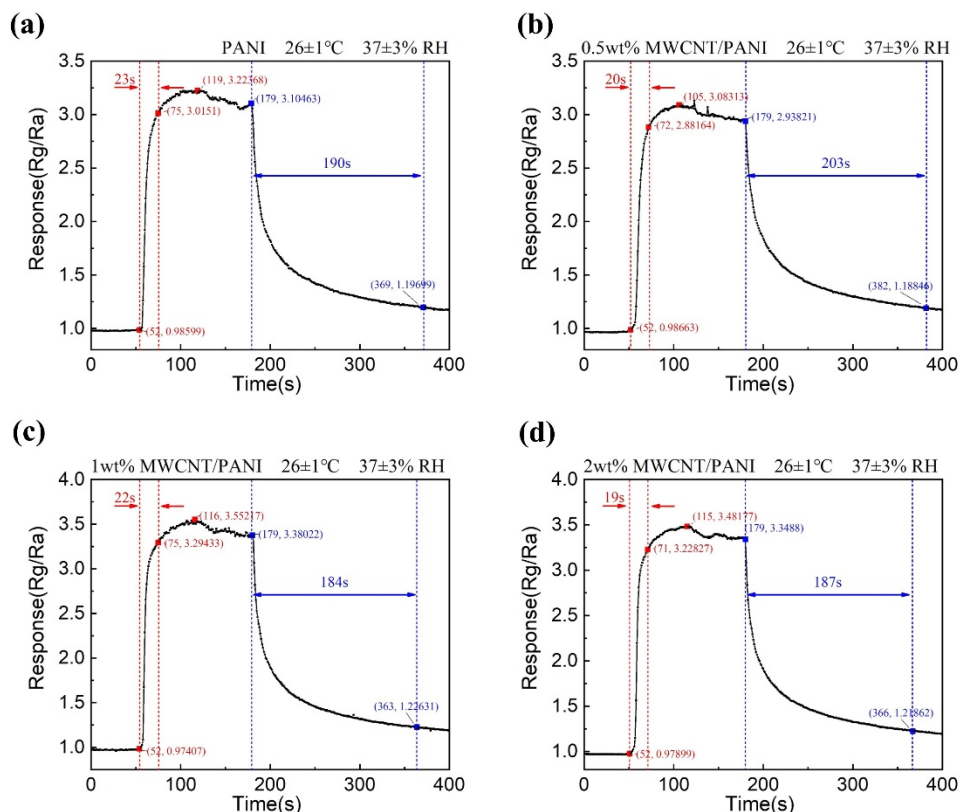**Figure S5.** Response recovery times of flexible sensors with different weight ratios under 60 ppm NH<sub>3</sub>.

The average response time and recovery time of the sensors at 60 ppm NH<sub>3</sub> are 21s and 191s respectively.

**Table S3.** Performance comparison of response recovery time of various flexible NH<sub>3</sub> sensors.

| Response time | Recovery time | Test concentration | Reference |
|---------------|---------------|--------------------|-----------|
| 213s          | 89s           | 25 ppm             | [3]       |
| 276s          | 388s          | 1 ppm              | [4]       |
| 150s          | 300s          | 1 ppm              | [6]       |
| 120s          | 300s          | 20ppm              | [7]       |
| 21s           | 191s          | 60 ppm             | This work |

#### References:

- Kim, S.J.; Koh, H.-J.; Ren, C.E.; Kwon, O.; Maleski, K.; Cho, S.-Y.; Anasori, B.; Kim, C.-K.; Choi, Y.-K.; Kim, J.; et al. Metallic Ti<sub>3</sub>C<sub>2</sub>T<sub>x</sub> MXene Gas Sensors with Ultrahigh Signal-to-Noise Ratio. *ACS Nano* **2018**, *12*, 986–993, doi:10.1021/acsnano.7b07460.
- Choi, J.; Kim, Y.; Cho, S.; Park, K.; Kang, H.; Kim, S.J.; Jung, H. In Situ Formation of Multiple Schottky Barriers in a Ti<sub>3</sub>C<sub>2</sub> MXene Film and Its Application in Highly Sensitive Gas Sensors. *Adv. Funct. Mater.* **2020**, *30*, 2003998, doi:10.1002/adfm.202003998.

- 
3. Kumar, L.; Rawal, I.; Kaur, A.; Annapoorni, S. Flexible Room Temperature Ammonia Sensor Based on Polyaniline. *Sens. Actuators B Chem.* **2017**, *240*, 408–416, doi:10.1016/j.snb.2016.08.173.
  4. Wen, X.; Cai, Y.; Nie, X.; Xiong, J.; Wang, Y.; Song, H.; Li, Z.; Shen, Y.; Li, C. PSS-Doped PANI Nanoparticle/Ti<sub>3</sub>C<sub>2</sub>T<sub>x</sub> Composites for Conductometric Flexible Ammonia Gas Sensors Operated at Room Temperature. *Sens. Actuators B Chem.* **2023**, *374*, 132788, doi:10.1016/j.snb.2022.132788.
  5. Kulkarni, S.B.; Navale, Y.H.; Navale, S.T.; Stadler, F.J.; Ramgir, N.S.; Patil, V.B. Hybrid Polyaniline-WO<sub>3</sub> Flexible Sensor: A Room Temperature Competence towards NH<sub>3</sub> Gas. *Sens. Actuators B Chem.* **2019**, *288*, 279–288, doi:10.1016/j.snb.2019.02.094.
  6. Wu, Q. An Enhanced Flexible Room Temperature Ammonia Gas Sensor Based on GP-PANI/PVDF Multi-Hierarchical Nanocomposite Film. *Sens. Actuators* **2021**.
  7. Zhu, C.; Zhou, T.; Xia, H.; Zhang, T. Flexible Room-Temperature Ammonia Gas Sensors Based on PANI-MWCNTs/PDMS Film for Breathing Analysis and Food Safety. *Nanomaterials* **2023**, *13*, 1158, doi:10.3390/nano13071158.
